# Supplementary material
Source: Springer Nature journal article supplement (http://www.springermedizin.de/resource/supplementary/12947_2008_196_MOESM3_ESM.pdf/9556430)

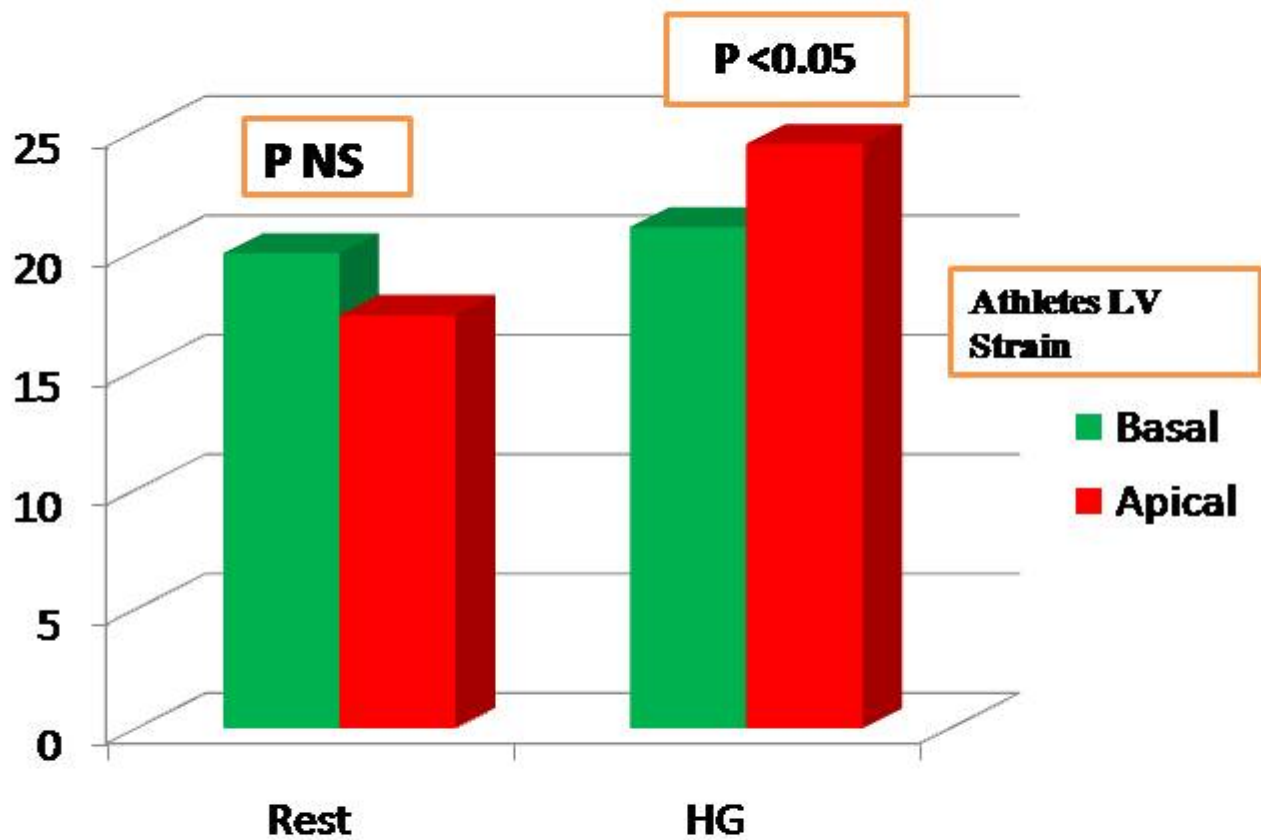

Supplement: MOESM3 [file 9556430]
